# Supplementary material for: Uncovering spin-orbit coupling-independent hidden spin polarization of energy bands in antiferromagnets
Source: Springer Nature journal article supplement (doi:10.1038/s41467-023-40877-8), 2023-08-31
Supplement: MOESM1 [file 41467_2023_40877_moesm1_esm.pdf]

Lin-Ding Yuan<sup>1</sup>, Xiuwen Zhang<sup>1</sup>, Carlos Mera Acosta<sup>2</sup>, Alex Zunger<sup>1</sup>

<sup>1</sup>Renewable and Sustainable Energy Institute, University of Colorado, Boulder, Colorado 80309, USA

<sup>2</sup>

**Figure S1: Energy spectrum of antiferromagnetic tetragonal CuMnAs on the conventional k-paths. a** with SOC turned off, and **b** with SOC turned on.

Figure S2 illustrates the hidden spin polarization in bulk hexagonal  $\text{CoBr}_2$  (SST-2 class) composed of two ferromagnetic layers (SST-5 class) with opposite magnetization. The crystal structure is antiferromagnetically ordered with magnetic moments collinearly aligned in the (001) direction. The two  $\text{FeBr}_2$  layers are connected by both the  $C_2$  and  $C_6$  symmetries, which restore the spin degeneracy of the bulk and result in a compensated net spin polarization (Fig. S2b). However, the corresponding spin polarization for the bottom two conduction bands (C1 and C2) projected onto the  $\Gamma$ -sector and  $K$ -sector (hidden spin polarization), shown in Fig. S2c, are non-zero and compensate each other.

Figure S2: Hidden spin polarization from individual ferromagnetic sectors in bulk hexagonal  $\text{CoBr}_2$  (bulk belonging to SST-2 class with sector belonging to SST-5 class). a) crystal structure of antiferromagnetic  $\text{CoBr}_2$  composed of two ferromagnetic layers with opposite magnetization (indicated by red and blue polyhedra) in the unit cell.

to red. The crystal and magnetic structure for hexagonal  $\text{CoBr}_2$  used in our DFT calculations are taken from Ref. [3]. The electronic structure and hidden spin polarization are calculated using the PBE+U method with  $U=3.32$  eV,  $J=0$  eV on Co-3d orbitals.

Figure S3 illustrates the hidden spin polarization effect in  $\text{Ca}_3\text{Ru}_2\text{O}_7$  being bulk SST-3 class (MSG  $P6_3/m2_1$ ) but made of SST-5 class FM  $\text{RuO}_7$  sectors ( $\alpha$ -sector and  $\beta$ -sector in Fig. S3a). The crystal is antiferromagnetically ordered with its magnetic moments collinearly aligned in (010) direction. The two ferromagnetically ordered  $\text{Ru}_2\text{O}_7$



Figure S5: Hidden spin polarization from individual antiferromagnetic sectors in bulk  $\text{MnS}_2$  (bulk belonging to SST-3 class with sector belonging to SST-4 class). a crystal structure of antiferromagnetic  $\text{MnS}_2$  composed of two antiferromagnetic sectors with opposite magnetic ordering (indicated by red and blue polyhedra) in the unit cell. The two layers are referred as sector- and sector- , respectively; b spin degenerate bands of  $\text{MnS}_2$ . c Hidden spin polarization from each individual sector of the highest two valence bands (V1 and V2) on k-plane. The up and down spins are mapped to the color from blue to red. The crystal and magnetic structure for tetragonal  $\text{MnS}_2$  used in our DFT calculations are taken from Ref. [6]. The electronic structure and hidden spin polarization are calculated using the PBE+U method with  $U=5.0$  eV,  $J=0$  eV on Mn-3d orbits.

Figure S6 illustrates how SST-4 class monolayers (wTm SS) reE}TJET@0.0000092 0 612 72 reW\*nBT/F81

polarization in a bilayer with  $\pi$ -asymmetric subsets that compensate each other. The SS magnitude depends on the intensity of the external electric field. Different from the relativistic Rashba and Dresselhaus SS that require the SOC, the electric field induces in the SST-1 FeSe bilayer a non-zero SS even in the absence of SOC (Fig. S6c).

Figure S6: Geometry an
